# Supplementary material
Source: MDPI journal article supplement (https://www.mdpi.com/2227-9717/8/6/742)
Supplement: s1 [file s1]

SUPPLEMENTARY MATERIALS

Thermophysical Properties of Newly Synthesized Ammonium-Based Protic Ionic Liquids: Effect of Temperature, Anion and Alkyl Chain Length

Nur Hidayah Zulaikha Othman Zailani 1, Normawati M. Yunus 1,*, Asyraf Hanim Ab Rahim 1 and Mohamad Azmi Bustam 2

1 Department of Fundamental and Applied Sciences, Center of Research in Ionic Liquids (CORIL), Institute of Contaminant Management for Oil and Gas, Universiti Teknologi PETRONAS, Seri Iskandar 32610, Malaysia; zulaikha95.nhz@gmail.com; normaw@utp.edu.my; asyrafhanim92@gmail.com

2 Department of Chemical Engineering, Center of Research in Ionic Liquids (CORIL), Institute of Contaminant Management for Oil and Gas, Universiti Teknologi PETRONAS, Seri Iskandar 32610, Malaysia; azmibustam@utp.edu.my

***** Correspondence: normaw@utp.edu.my; Tel.: +605-368-7689

**Table S1**: Data used for the validation of equipment for physical property measurements using [HMIM] [Tf2N] at T=298.15

|  | **[HMIM] [Tf2N]** | |
| --- | --- | --- |
|  | **This work** | **Literature** |
| Density, *ρ*/g.cm-3 | 1.3755 | 1.37213 [32] |
|  |  | 1.37100 [33] |
|  |  | 1.37080 [34] |
| Dynamic viscosity, *ƞ*/mPa.s | 68.881 | 68.000 [32] |
|  |  | 68.536 [34] |
| Refractive index, *n*D | 1.42971 | 1.42954 [33] |
|  |  | 1.43180 [34] |

**Table S2.** Density (*ρ*)values of PILs at temperatures (293.15 – 363.15)K.

| **T/K** | ***ρ* /g.cm-3** |  |  |  |  |  |
| --- | --- | --- | --- | --- | --- | --- |
| **[DEA][C5]** | **[DEA][C6]** | **[DEA][C7]** | **[DBA][C5]** | **[DBA][C6]** | **[DBA][C7]** |
| 293.15 | 0.9387 | 0.9407 | 0.9180 | 0.8988 | 0.8984 | 0.8884 |
| 303.15 | 0.9330 | 0.9333 | 0.9117 | 0.8933 | 0.8920 | 0.8819 |
| 313.15 | 0.9259 | 0.9261 | 0.9049 | 0.8858 | 0.8846 | 0.8743 |
| 323.15 | 0.9187 | 0.9190 | 0.8982 | 0.8780 | 0.8768 | 0.8665 |
| 333.15 | 0.9116 | 0.9118 | 0.8913 | 0.8699 | 0.8689 | 0.8584 |
| 343.15 | 0.9045 | 0.9046 | 0.8846 | 0.8618 | 0.8606 | 0.8501 |
| 353.15 | 0.8972 | 0.8974 | 0.8778 | 0.8528 | 0.8521 | 0.8416 |
| 363.15 | 0.8901 | 0.8901 | 0.8707 | 0.8441 | 0.8433 | 0.8328 |

**Table S3.** Dynamic viscosity (*ƞ*) values of PILs at temperatures (293.15 – 363.15)K.

| **T/K** | ***ƞ*/mPa.s** |  |  |  |  |  |
| --- | --- | --- | --- | --- | --- | --- |
| **[DEA][C5]** | **[DEA][C6]** | **[DEA][C7]** | **[DBA][C5]** | **[DBA][C6]** | **[DBA][C7]** |
| 293.15 | 34.165 | 34.264 | 62.305 | 133.260 | 134.710 | 138.330 |
| 303.15 | 23.417 | 23.422 | 39.947 | 70.115 | 71.885 | 74.475 |
| 313.15 | 16.648 | 16.644 | 26.872 | 39.185 | 40.481 | 42.179 |
| 323.15 | 12.256 | 12.271 | 18.889 | 23.239 | 24.174 | 25.233 |
| 333.15 | 9.323 | 9.313 | 13.757 | 14.548 | 15.177 | 15.884 |
| 343.15 | 7.248 | 7.259 | 10.314 | 9.551 | 9.963 | 10.455 |
| 353.15 | 5.763 | 5.776 | 7.913 | 6.534 | 6.797 | 7.155 |
| 363.15 | 4.666 | 4.666 | 6.202 | 4.621 | 4.779 | 5.062 |

**Table S4:** Refractive index (*n*D) values of PILs at temperatures (293.15K to 333.15)K.

| **T/K** | ***n*D** |  |  |  |  |  |
| --- | --- | --- | --- | --- | --- | --- |
| **[DEA][C5]** | **[DEA][C6]** | **[DEA][C7]** | **[DBA][C5]** | **[DBA][C6]** | **[DBA][C7]** |
| 293.15 | 1.43230 | 1.43801 | 1.43845 | 1.44288 | 1.44440 | 1.44531 |
| 298.15 | 1.43060 | 1.43644 | 1.43673 | 1.44107 | 1.44259 | 1.44354 |
| 303.15 | 1.42884 | 1.43481 | 1.43501 | 1.43920 | 1.44071 | 1.44149 |
| 308.15 | 1.42712 | 1.43310 | 1.43330 | 1.43725 | 1.43883 | 1.43952 |
| 313.15 | 1.42540 | 1.43146 | 1.43162 | 1.43534 | 1.43692 | 1.43752 |
| 318.15 | 1.42370 | 1.42987 | 1.42992 | 1.43343 | 1.43500 | 1.43556 |
| 323.15 | 1.42199 | 1.42825 | 1.42839 | 1.43150 | 1.43308 | 1.43355 |
| 328.15 | 1.42030 | 1.42663 | 1.42659 | 1.42952 | 1.43090 | 1.43149 |
| 333.15 | 1.41865 | 1.42503 | 1.42483 | 1.42750 | 1.42884 | 1.42941 |

Figure S1: 1H NMR analysis of [DEA] [C5]

Figure S2: 13C NMR analysis of [DEA] [C5]

Figure S3: 1H NMR analysis of [DEA] [C6]

Figure S4: 13C NMR analysis of [DEA] [C6]

Figure S5: 1H NMR analysis of [DEA] [C7]

Figure S6: 13C NMR analysis of [DEA] [C7]

Figure S7: 1H NMR analysis of [DBA] [C5]

Figure S8: 13C NMR analysis of [DBA] [C5]

Figure S9: 1H NMR analysis of [DBA] [C6]

Figure S10: 13C NMR analysis of [DBA] [C6]

Figure S11: 1H NMR analysis of [DBA] [C7]

Figure S12: 13C NMR analysis of [DBA] [C5]
